# Supplementary material
Source: ML conference proceedings conference paper supplement (https://aclanthology.org/2021.findings-acl.61)
Supplement: OptionalSupplementaryMaterial [file 2021.findings-acl.61.OptionalSupplementaryMaterial.pdf]

## A Detailed performance of MAW

We report the average and maximum MAW accuracy across different layers in Table 6. The average MAW of 6 layers significantly outperforms the random baseline, which indicates that the relevant question concept plays a highly important role in BERT encoding without fine-tuning. BERT-FT outperforms BERT in terms of both average MAW accuracy and maximum MAW accuracy, which shows that structured commonsense knowledge is enhanced by supervised training on commonsense tasks.

| L   | BERT-FT      |       |   | BERT         |       |   | Rand  |
|-----|--------------|-------|---|--------------|-------|---|-------|
|     | Max          | Avg   | t | Max          | Avg   | t |       |
| 11  | 34.11        | 19.78 | ✓ | 32.44        | 14.47 | ✓ | 10.53 |
| 10  | 39.09        | 26.10 | ✓ | 40.84        | 22.22 | ✓ | 10.53 |
| 9   | 46.31        | 25.59 | ✓ | <b>46.82</b> | 18.68 | ✓ | 10.53 |
| 8   | <b>49.22</b> | 13.71 | ✓ | 44.48        | 10.15 | - | 10.53 |
| 7   | 32.76        | 8.88  | - | 28.00        | 5.61  | - | 10.53 |
| 6   | 40.68        | 12.16 | ✓ | 41.99        | 9.01  | - | 10.53 |
| 5   | 33.30        | 14.41 | ✓ | 13.22        | 4.34  | - | 10.53 |
| 4   | 38.89        | 19.09 | ✓ | 24.10        | 10.46 | - | 10.53 |
| 3   | 37.30        | 14.59 | ✓ | 24.74        | 7.43  | - | 10.53 |
| 2   | 35.08        | 17.71 | ✓ | 31.96        | 12.14 | ✓ | 10.53 |
| 1   | 29.01        | 15.08 | ✓ | 27.64        | 11.09 | ✓ | 10.53 |
| 0   | 45.55        | 23.05 | ✓ | 46.16        | 22.95 | ✓ | 10.53 |
| All | 49.22        | 17.35 | ✓ | 46.82        | 12.38 | ✓ | 10.53 |

Table 6: The average and maximum MAW accuracy across different layers. ✓ indicates  $p$ -value  $< 0.01$ .

## B Performance of MAT

Table 7 shows the MAT and MAS performance for each attention head across five turns. Noted that the standard derivations are only 1.17% and 1.76% for MAT and MAS, respectively, which demonstrates the robustness of our methods.

## C Implementation Details

We adopt the huggingface BERT-base implementation for multiple-choice on CommonsenseQA. We conduct fine-tuning experiments using GeForce GTX 2080Ti. For BERT-FT and BERT-probing, we optimize the parameters with grid search: training epochs 3, learning rate  $\{5e-4, 3e-5, 5e-5, 5e-6\}$ , training batch size  $\{8, 16, 32\}$ , gradient accumulation steps  $\{2, 4, 8\}$ . To demonstrate the robustness of our analysis method, we repeat the experiment 5 times with the same hyperparameter, and report the experiment results based on one random model.

We calculate the attribution score to interpret BERT using captum, which is an extensible library

for model interpret ability built on Pytorch.

| Layer | MAT   |       |       |       |       |            | MAS   |       |       |       |       |            |
|-------|-------|-------|-------|-------|-------|------------|-------|-------|-------|-------|-------|------------|
|       | M1    | M2    | M3    | M4    | M5    | mean±std   | M1    | M2    | M3    | M4    | M5    | mean±std   |
| 0     | 20.10 | 20.26 | 20.32 | 20.35 | 20.58 | 20.32±0.17 | 18.86 | 18.38 | 18.40 | 18.07 | 18.19 | 18.38±0.30 |
| 1     | 19.35 | 19.36 | 19.11 | 19.39 | 19.51 | 19.34±0.15 | 21.00 | 20.09 | 20.37 | 20.16 | 20.23 | 20.37±0.37 |
| 2     | 20.25 | 19.57 | 19.97 | 20.13 | 19.85 | 19.95±0.26 | 19.20 | 19.61 | 20.19 | 19.03 | 19.01 | 19.41±0.50 |
| 3     | 21.98 | 21.15 | 21.80 | 22.05 | 23.16 | 22.03±0.73 | 18.88 | 19.46 | 18.39 | 18.12 | 19.01 | 18.77±0.53 |
| 4     | 19.78 | 19.19 | 19.91 | 20.15 | 19.27 | 19.66±0.42 | 19.99 | 19.50 | 20.05 | 22.28 | 20.76 | 20.52±1.08 |
| 5     | 19.90 | 19.74 | 19.89 | 20.33 | 20.55 | 20.08±0.34 | 16.98 | 16.90 | 17.90 | 17.56 | 17.15 | 17.30±0.42 |
| 6     | 19.29 | 19.31 | 19.02 | 19.25 | 18.51 | 19.08±0.34 | 15.77 | 16.25 | 15.72 | 18.27 | 17.15 | 16.63±1.08 |
| 7     | 20.71 | 20.47 | 19.92 | 20.14 | 19.30 | 20.11±0.54 | 18.40 | 19.70 | 16.57 | 22.09 | 20.66 | 19.48±2.11 |
| 8     | 19.48 | 21.20 | 21.00 | 20.65 | 19.13 | 20.29±0.93 | 18.16 | 19.70 | 17.28 | 21.89 | 19.12 | 19.23±1.75 |
| 9     | 21.95 | 21.85 | 22.87 | 21.80 | 22.88 | 22.27±0.55 | 12.54 | 14.94 | 13.07 | 14.85 | 13.75 | 13.83±1.06 |
| 10    | 25.59 | 24.95 | 25.61 | 24.96 | 25.07 | 25.24±0.34 | 16.60 | 17.80 | 15.28 | 18.12 | 16.68 | 16.90±1.12 |
| 11    | 45.91 | 45.87 | 44.61 | 42.28 | 41.88 | 44.11±1.93 | 10.32 | 18.21 | 6.04  | 22.73 | 22.80 | 16.02±7.55 |

Table 7: MAT and MAS overlapping rate for each attention head across five models, as well as their average value with a standard deviation. M - Model.
